# Supplementary material for: BMPR2 Variants Underlie Nonsyndromic Oligodontia
Source: MDPI journal article supplement (doi:10.3390/ijms24021648), 2023-01-13
Supplement: s1 [file s1]

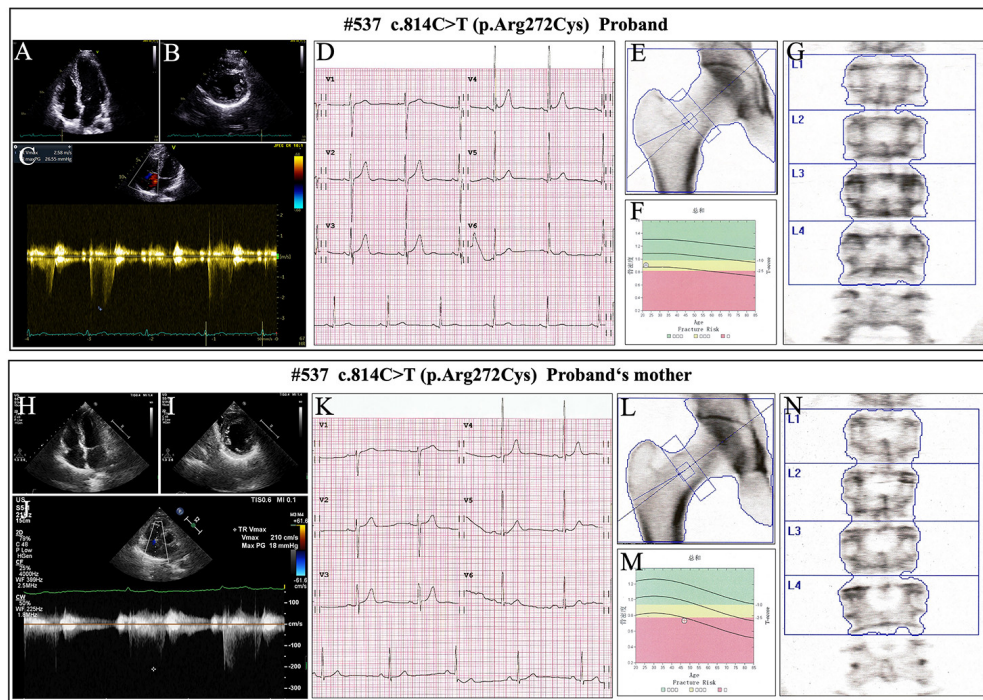

**Figure S1.** Echocardiographic, electrocardiographic, and DEXA examination of family #537. (A–C) Echocardiographic images of #537 proband carrying a *BMPR2* variant, c.814C>T (p.Arg272Cys); (D) Electrocardiographic examination result of #537 proband; (E–G) DEXA scan images of #537 proband; (H–J) Echocardiographic images of the mother of #537 proband carrying a *BMPR2* variant, c.814C>T (p.Arg272Cys); (K) Electrocardiographic examination of the mother of #537 proband; (L–N) DEXA scan images of the mother of #537 proband. DEXA, dual-energy X-ray absorptiometry; *BMPR2*, bone morphogenetic protein receptor type 2.
